# Supplementary material for: The prevalence of homologous recombination deficiency (HRD) in various solid tumors and the role of HRD as a single biomarker to immune checkpoint inhibitors
Source: Springer Nature journal article supplement (doi:10.1007/s00432-021-03781-6), 2021-09-12
Supplement: MOESM1 [file 19655464]

1 **S1. The distribution of HRD mutations for each cancer type**

|               | Colo-rectal cancer (n=151) | Gastric cancer (n=116) | Sarcoma (n=60) | Biliary tract cancer (n=48) | Pancreatic cancer (n=42) | Genitourinary cancer (n=25) | Other GI cancer (n=22) | Melanoma (n=23) | HCC (n=10) | Rare cancer (n=4) | Total |
|---------------|----------------------------|------------------------|----------------|-----------------------------|--------------------------|-----------------------------|------------------------|-----------------|------------|-------------------|-------|
| <b>ARID1A</b> | 24                         | 19                     | 6              | 9                           | 7                        | 4                           | 4                      | 2               | 2          | 0                 | 77    |
| <b>ATM</b>    | 25                         | 13                     | 4              | 6                           | 9                        | 4                           | 3                      | 4               | 2          | 1                 | 71    |
| <b>ATRX</b>   | 9                          | 3                      | 5              | 2                           | 4                        | 2                           | 0                      | 1               | 0          | 1                 | 27    |
| <b>BAP1</b>   | 0                          | 0                      | 0              | 0                           | 0                        | 0                           | 0                      | 1               | 0          | 0                 | 1     |
| <b>BARD1</b>  | 24                         | 11                     | 11             | 4                           | 6                        | 5                           | 1                      | 3               | 1          | 1                 | 67    |
| <b>BLM</b>    | 16                         | 6                      | 5              | 3                           | 6                        | 3                           | 4                      | 0               | 0          | 0                 | 43    |
| <b>BRCA1</b>  | 11                         | 5                      | 3              | 5                           | 3                        | 5                           | 2                      | 3               | 0          | 1                 | 38    |
| <b>BRCA2</b>  | 26                         | 20                     | 9              | 14                          | 9                        | 7                           | 3                      | 1               | 1          | 0                 | 90    |
| <b>BRIP1</b>  | 5                          | 4                      | 4              | 2                           | 2                        | 2                           | 2                      | 1               | 0          | 0                 | 22    |
| <b>CHEK1</b>  | 3                          | 1                      | 0              | 2                           | 0                        | 0                           | 0                      | 0               | 0          | 0                 | 6     |
| <b>CHEK2</b>  | 6                          | 6                      | 0              | 1                           | 1                        | 2                           | 0                      | 1               | 1          | 0                 | 18    |
| <b>FANCA</b>  | 4                          | 5                      | 1              | 1                           | 0                        | 0                           | 0                      | 0               | 0          | 0                 | 11    |
| <b>FANCC</b>  | 7                          | 3                      | 0              | 2                           | 0                        | 0                           | 2                      | 0               | 1          | 0                 | 15    |
| <b>FANCD2</b> | 26                         | 8                      | 6              | 3                           | 2                        | 4                           | 1                      | 0               | 3          | 0                 | 53    |
| <b>FANCE</b>  | 3                          | 2                      | 0              | 0                           | 0                        | 1                           | 0                      | 1               | 0          | 0                 | 7     |
| <b>FANCF</b>  | 2                          | 0                      | 1              | 1                           | 0                        | 0                           | 0                      | 0               | 1          | 0                 | 5     |
| <b>FANCG</b>  | 0                          | 2                      | 0              | 0                           | 0                        | 0                           | 0                      | 0               | 0          | 0                 | 2     |
| <b>FANCL</b>  | 2                          | 2                      | 1              | 1                           | 0                        | 0                           | 1                      | 0               | 0          | 0                 | 7     |
| <b>MRE11A</b> | 0                          | 0                      | 0              | 0                           | 0                        | 0                           | 0                      | 0               | 0          | 0                 | 0     |
| <b>NBN</b>    | 11                         | 14                     | 5              | 4                           | 1                        | 3                           | 0                      | 0               | 1          | 1                 | 40    |
| <b>PALB2</b>  | 13                         | 9                      | 3              | 3                           | 1                        | 2                           | 3                      | 0               | 2          | 0                 | 46    |
| <b>PTEN</b>   | 8                          | 3                      | 1              | 2                           | 0                        | 2                           | 0                      | 0               | 0          | 0                 | 16    |
| <b>RAD50</b>  | 12                         | 4                      | 1              | 2                           | 1                        | 2                           | 0                      | 1               | 0          | 0                 | 23    |
| <b>RAD51</b>  | 6                          | 2                      | 1              | 2                           | 1                        | 0                           | 0                      | 0               | 1          | 0                 | 13    |
| <b>RAD51B</b> | 3                          | 0                      | 2              | 1                           | 0                        | 0                           | 1                      | 0               | 0          | 0                 | 7     |

2

3 **S2-A** HRD and progression status for each cancer type

| Tumor type               | Total (N = 65) | Progression (n ) | HRD mutation | HRD mutation with progression |
|--------------------------|----------------|------------------|--------------|-------------------------------|
| Colorectal cancer        | 4              | 2                | 4            | 2                             |
| Gastric cancer           | 14             | 12               | 12           | 10                            |
| Sarcoma                  | 3              | 2                | 2            | 2                             |
| Biliary tract            | 5              | 4                | 5            | 4                             |
| Pancreatic               | 1              | 1                | 1            | 1                             |
| Genitourinary            | 12             | 8                | 12           | 8                             |
| Other GI cancer          | 1              | 1                | 1            | 1                             |
| Melanoma                 | 20             | 14               | 11           | 8                             |
| Hepatocellular carcinoma | 4              | 3                | 4            | 3                             |
| Rare cancer              | 1              | 1                | 1            | 1                             |

4 GI gastrointestinal, HRD Homologous recombination deficiency

5 **S2-B** Kaplan-Meier curves for progression-free survival of each cancer type according to HRD

6 status.

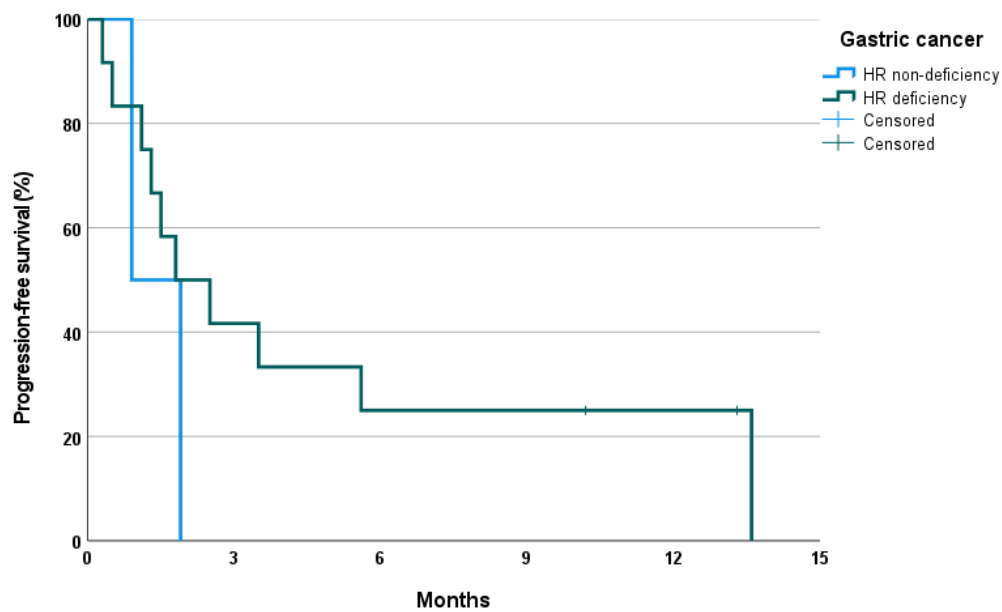

7

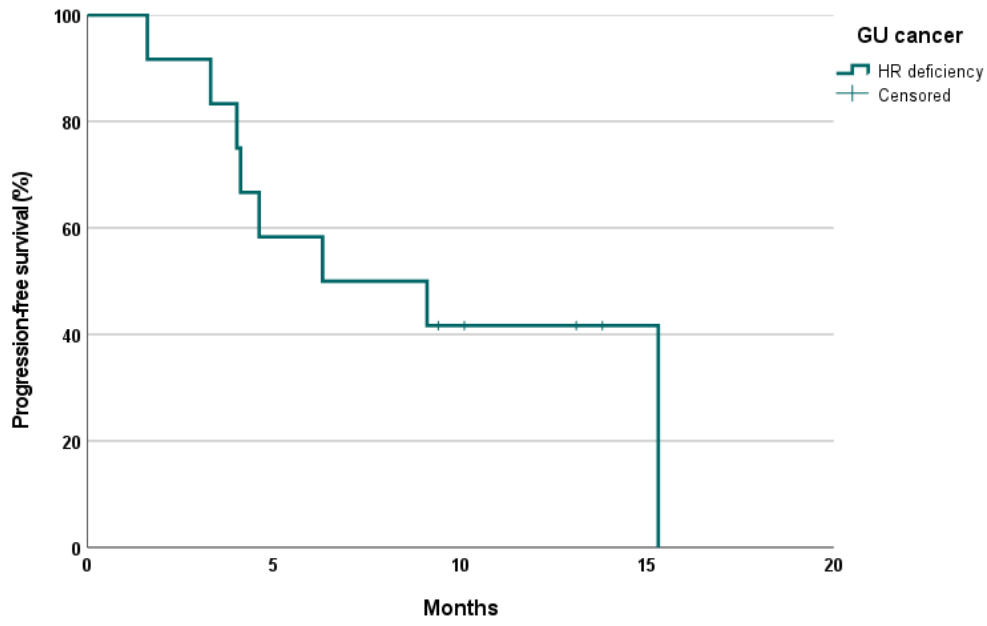

8

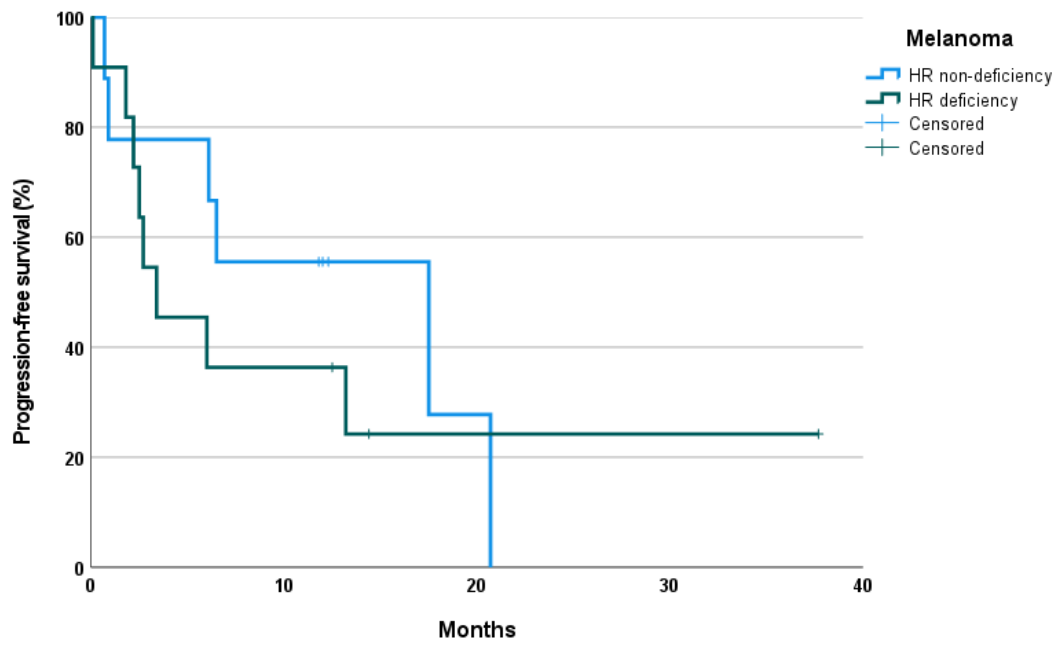

9

10 GU genitourinary

11
